# Supplementary material for: Ultrathin wide band gap kesterites
Source: Royal Society of Chemistry journal article supplement (doi:10.1039/d2fd00052k), 2022-01-01
Supplement: d2fd00052k1.pdf [file d2fd00052k1.pdf]

## Supplementary information

### Ultrathin wide band gap kesterites

Charlotte Platzer Björkman,<sup>\*a</sup> Jes Larsen,<sup>a</sup> Nishant Saini,<sup>a</sup> Melike Babucci<sup>a</sup> and Natalia Martin<sup>a</sup>

---

\*Corresponding author

<sup>a</sup> Div. Solar Cell Technology, Dep. Materials Science and Engineering, Uppsala University, Sweden,  
charlotte.platzer@angstrom.uu.se

Table S1: CZTS thickness series of figure 1, previously published compared to new data.

| Thickness [nm] | Voc [mV] | Jsc [mA/cm <sup>2</sup> ] | FF [%] | Eff [%] | Eg [eV] | Cu/Sn | Zn/(Cu+Sn) | Ref       |
|----------------|----------|---------------------------|--------|---------|---------|-------|------------|-----------|
| 2000           | 594      | 19.6                      | 53.7   | 5.9     | 1.47    | 1.79  | 0.40       | [1]       |
| 1500           | 583      | 17.6                      | 53.8   | 5.6     | 1.47    | 1.90  | 0.35       | [1]       |
| 1000           | 580      | 18.0                      | 51.8   | 5.4     | 1.48    | 1.81  | 0.38       | [1]       |
| 750            | 595      | 17.4                      | 56.5   | 6.0     | 1.47    | 1.88  | 0.41       | [1]       |
| 700            | 497      | 15.7                      | 49.1   | 3.8     | 1.47    | 1.82  | 0.38       | [1]       |
| 500            | 478      | 13.2                      | 46.6   | 3.0     | 1.49    | 1.81  | 0.41       | [1]       |
| 1000           | 650      | 14.0                      | 48.7   | 4.4     | 1.52    | 1.81  | 0.32       | This work |
| 750            | 630      | 12.8                      | 41.0   | 3.3     | 1.49    | 1.90  | 0.36       | This work |
| 500            | 580      | 13.3                      | 53.1   | 4.1     | 1.44    | 1.90  | 0.35       | This work |
| 350            | 560      | 10.9                      | 41.2   | 2.5     | 1.50    | 1.86  | 0.35       | This work |

[1] Y. Ren, J.J.S. Scragg, C. Frisk, J.K. Larsen, S.-Y. Li, and C. Platzer-Björkman, *Physica Status Solidi A*, 2015, 1. doi: 10.1002/pssa.201532311

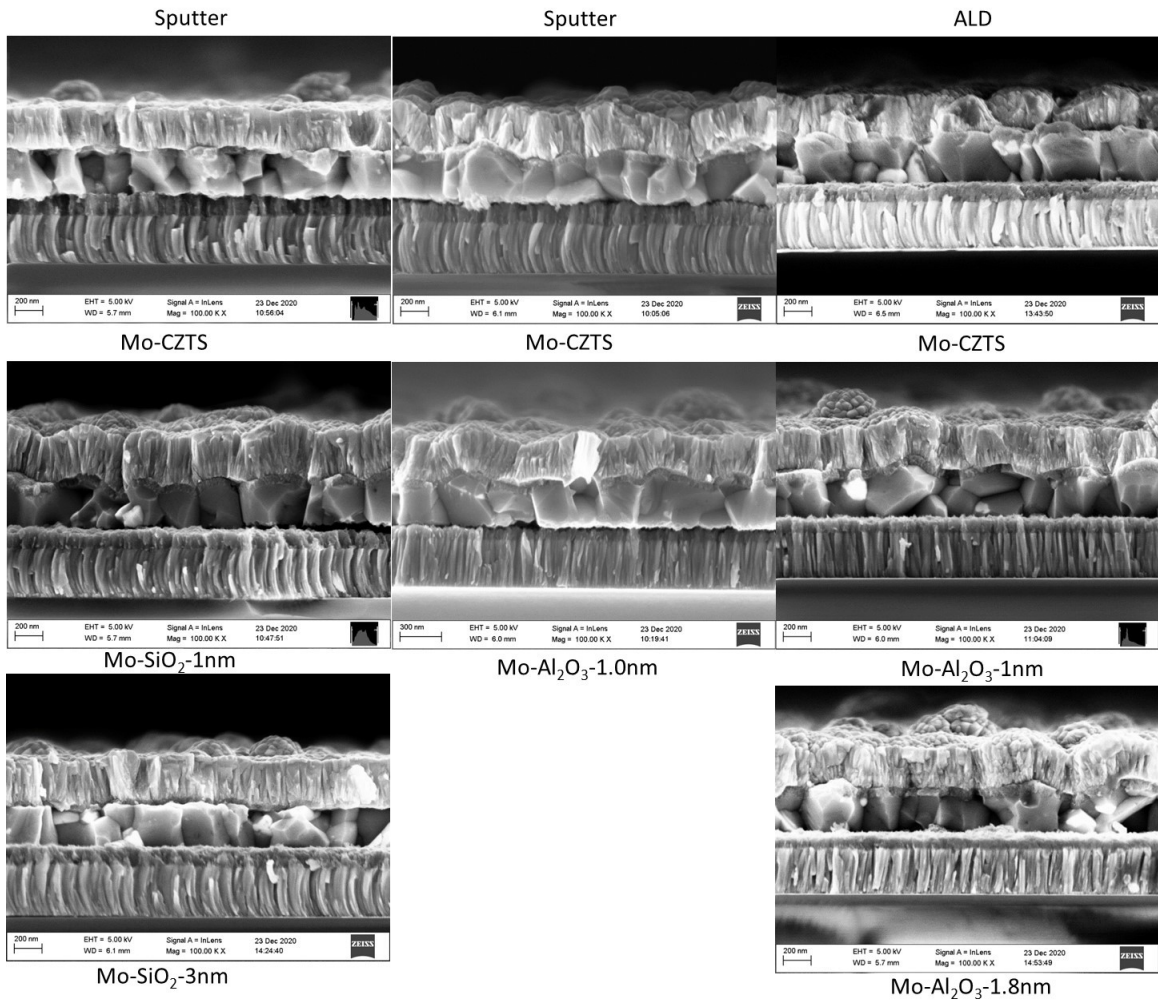

Figure S1: SEM cross sections of Mo/CZTS devices with and without different very thin passivation layers (sputtered SiO<sub>2</sub>, sputtered Al<sub>2</sub>O<sub>3</sub> and ALD Al<sub>2</sub>O<sub>3</sub>).

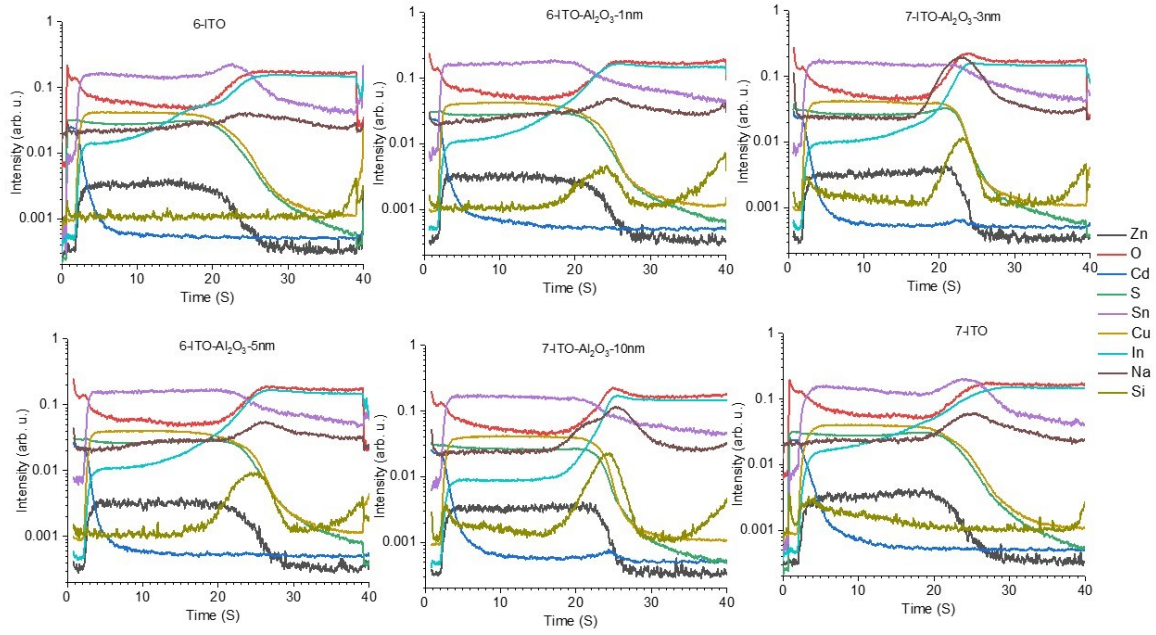

Figure S2: GDOES of ITO/CZTS with increasing thickness of sputtered SiO<sub>2</sub> passivation layers.

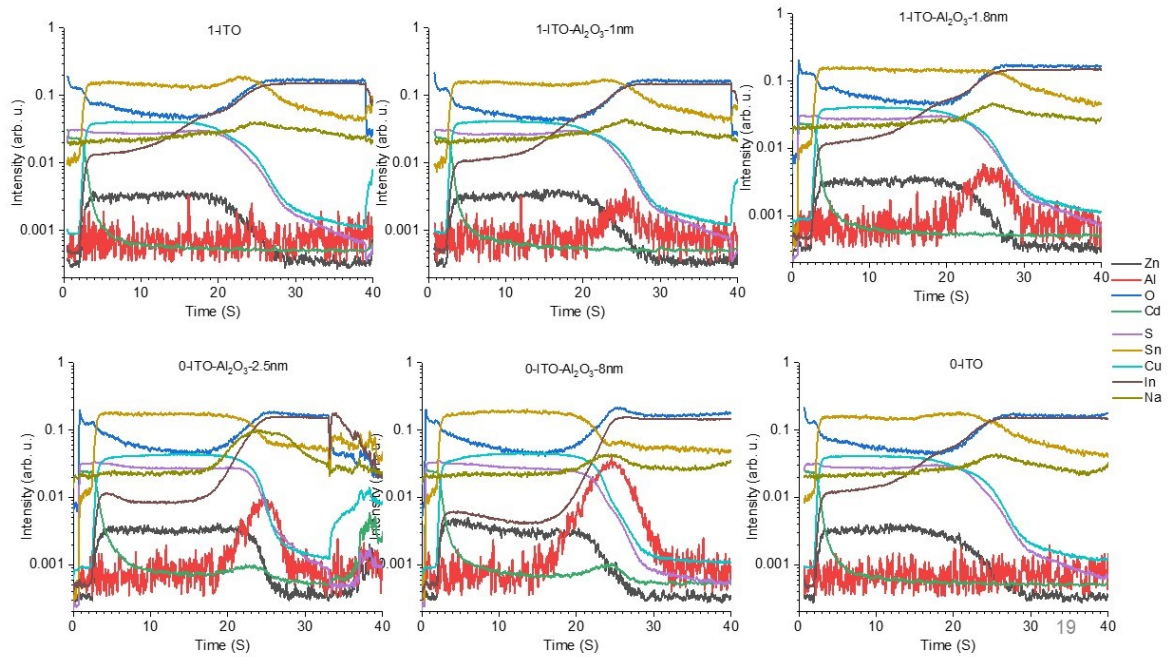

Figure S3: GDOES of ITO/CZTS with increasing thickness of ALD Al<sub>2</sub>O<sub>3</sub> passivation layers.
